# Supplementary material for: Components of the Complement Cascade Differ in Polycystic Ovary Syndrome
Source: MDPI journal article supplement (doi:10.3390/ijms232012232), 2022-10-13
Supplement: s1 [file s1]

Supplementary figure S1.

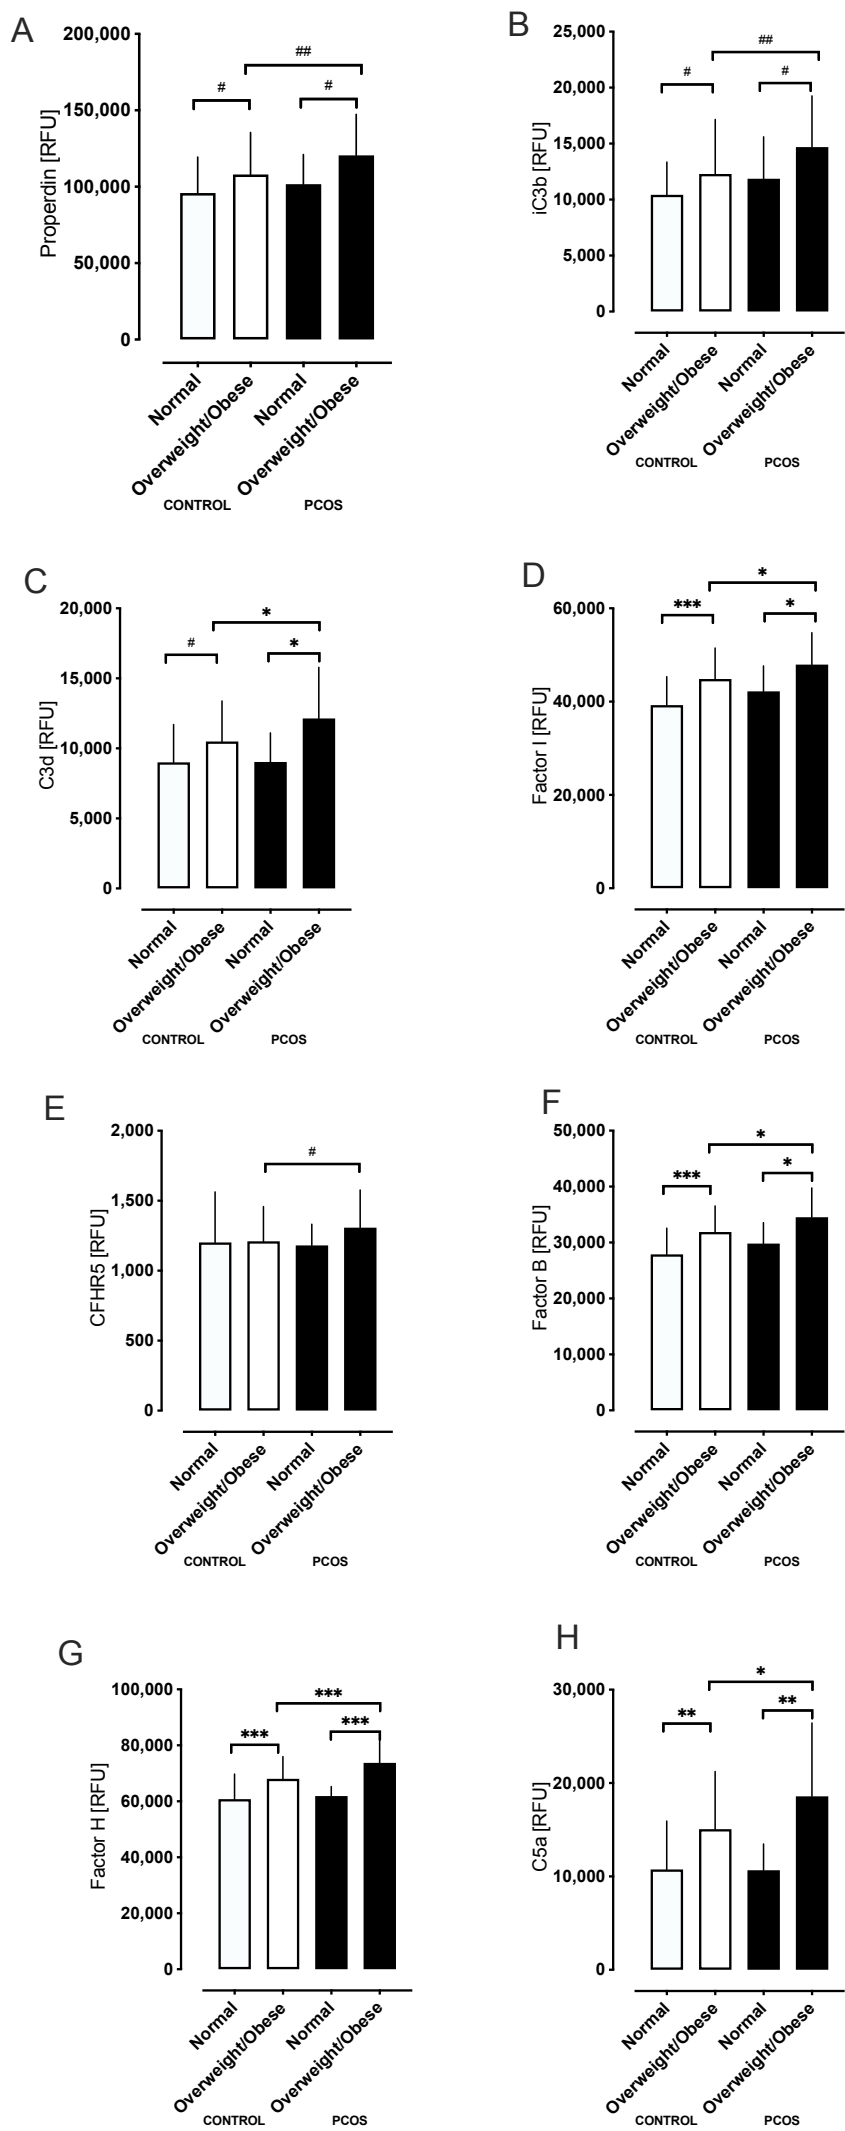

Supplementary figure S1. Protein levels categorized by BMI for Properdin (A), iC3b (B), C3d (C), Factor I (D), CFHR5 (E), Factor B (F), Factor H (G) and C5a (H). When the control (white bars) and PCOS (black bars) subjects were categorized according to BMI into normal weight, defined as BMI <25, and overweight/obese, defined as BMI 25 or higher, the protein levels were still significantly higher in the overweight/obese PCOS women versus the overweight/obese control women. # $p<0.05$ , ## $p<0.005$ , \* $p<0.01$ , \*\* $p<0.001$ , \*\*\* $p<0.0001$ .
